# Supplementary material for: Effect of transcription terminator usage on the establishment of transgene transcriptional gene silencing
Source: PubMed Central journal article supplement (PMC6064074; doi:10.1186/s13104-018-3649-2), 2018-07-28

**A**

| Thsp line | Segregation (resistant:sensitive) | Segregation ratio |
|-----------|-----------------------------------|-------------------|
| 1         | 54:6                              | 9                 |
| 2         | 53:6                              | 8,83              |
| 3         | 48:11                             | 4,36              |
| 4         | 43:18                             | 2,38              |
| 8         | 43:14                             | 3,07              |
| 9         | 40:18                             | 2,22              |
| 11        | 57:3                              | 19                |
| 15        | 47:9                              | 5,22              |
| 17        | 44:13                             | 3,38              |
| 19        | 44:13                             | 3,38              |
| 20        | 46:14                             | 3,28              |
| 21        | 56:4                              | 14                |
| 22        | 44:16                             | 2,75              |

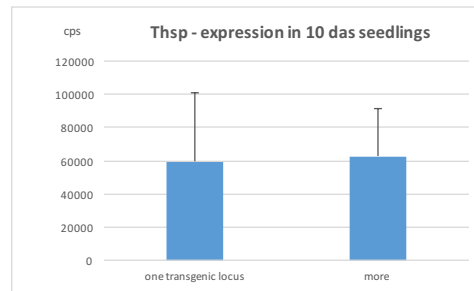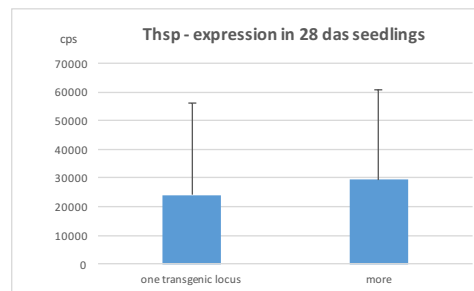

**B**

| T35S line | Segregation (resistant:sensitive) | Segregation ratio |
|-----------|-----------------------------------|-------------------|
| 1         | 49:11                             | 4,45              |
| 2         | 46:7                              | 6,57              |
| 3         | 47:10                             | 4,7               |
| 4         | 45:14                             | 3,21              |
| 5         | 32:25                             | 1,28              |
| 7         | 44:5                              | 8,8               |
| 10        | 45:15                             | 3                 |
| 12        | 47:11                             | 4,27              |
| 17        | 46:12                             | 3,83              |
| 19        | 43:13                             | 3,3               |
| 20        | 43:16                             | 2,68              |
| 21        | 48:10                             | 4,8               |
| 22        | 44:16                             | 2,75              |

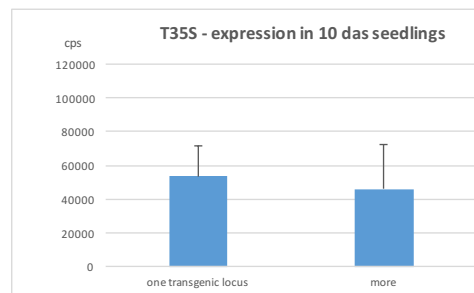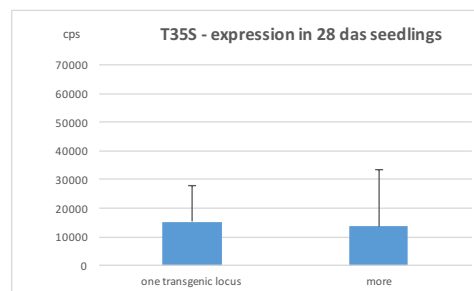

C

| Tless lines | Segregation (resistant:sensitive) | Segregation ratio |
|-------------|-----------------------------------|-------------------|
| 1           | 51:7                              | 7,28              |
| 2           | 44:12                             | 3,66              |
| 3           | 47:14                             | 3,35              |
| 5           | 36:20                             | 1,8               |
| 10          | 45:13                             | 3,46              |
| 12          | 46:13                             | 3,53              |
| 16          | 51:7                              | 3,53              |
| 17          | 35:22                             | 1,59              |
| 19          | 26:32                             | 0,81              |
| 23          | 45:14                             | 3,21              |
| 24          | 46:13                             | 3,53              |
| 25          | 46:11                             | 4,18              |
| 28          | 40:18                             | 2,22              |

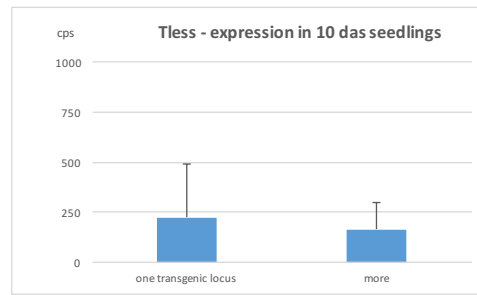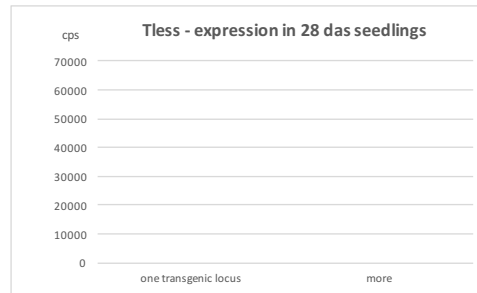

Supplement: 13104_2018_3649_MOESM3_ESM.pdf [file 13104_2018_3649_MOESM3_ESM.pdf]
