# Supplementary material for: Effect of transcription terminator usage on the establishment of transgene transcriptional gene silencing
Source: PubMed Central journal article supplement (PMC6064074; doi:10.1186/s13104-018-3649-2), 2018-07-28
Supplement: 13104_2018_3649_MOESM1_ESM.pdf [file 13104_2018_3649_MOESM1_ESM.pdf]

a

10 d.o.s.

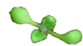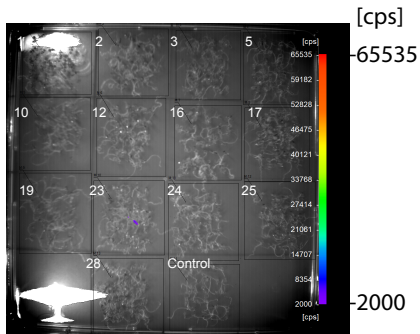

Tless

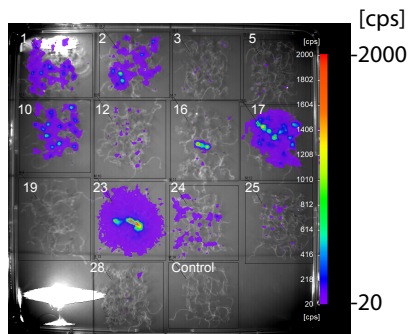

cps scale set at lower values

b

28 d.o.s.

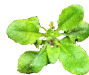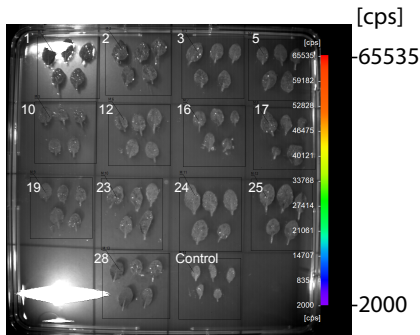

Tless

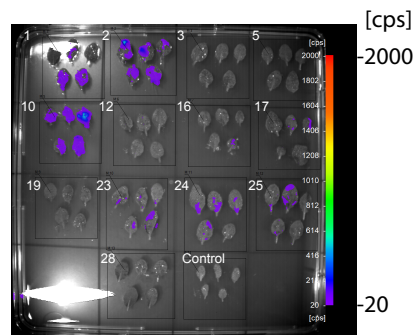

cps scale set at lower values
